# Supplementary material for: Solvent composition regulates the Se : Sb ratio in antimony selenide nanowires deposited from thiol–amine solvent mixtures
Source: Royal Society of Chemistry journal article supplement (doi:10.1039/d1na00814e), 2021-12-20
Supplement: d1na00814e1.pdf [file d1na00814e1.pdf]

Supplementary information

Solvent composition regulates the Se: Sb ratio in antimony selenide nanowires  
deposited from thiol–amine solvent mixtures

Vashishtha, A.<sup>1</sup>, Vana, O.<sup>1</sup>, and Edri, E.<sup>1,2,3\*</sup>

<sup>1</sup>Department of Chemical Engineering, Ben-Gurion University of the Negev, Be'er-Sheva 8410501, Israel.

<sup>2</sup>Ilse Katz Institute for Nanoscale Science and Technology, Be'er-Sheva 8410501, Israel.

<sup>3</sup>Blechner Center for Industrial Catalysis and Process Development, Be'er-Sheva 8410501, Israel

\*To whom correspondence should be addressed: [edrier@bgu.ac.il](mailto:edrier@bgu.ac.il)

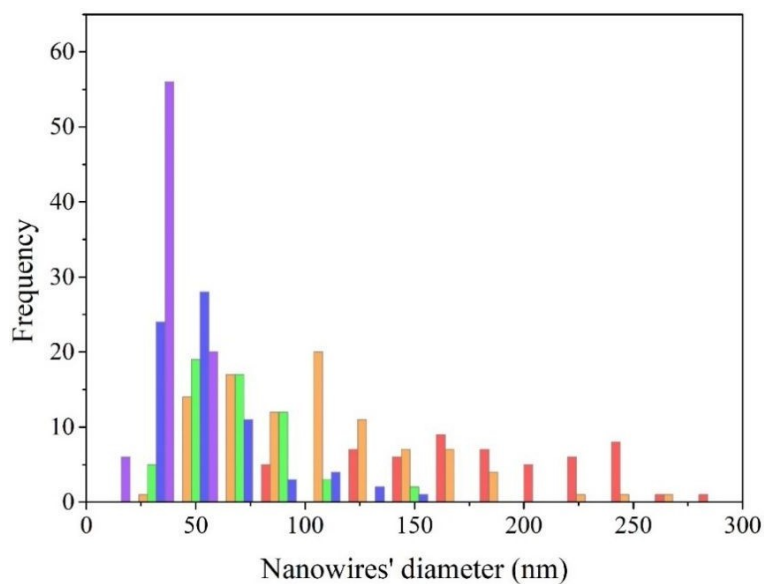

Figure S1. Histogram of antimony selenide nanowires prepared from different en: EDT ratios I.e., post-dissolution en dilution series (Red, orange, green, blue and purple bars indicate AP, 1:1, 1:4, 1:5 and 1:10, respectively).

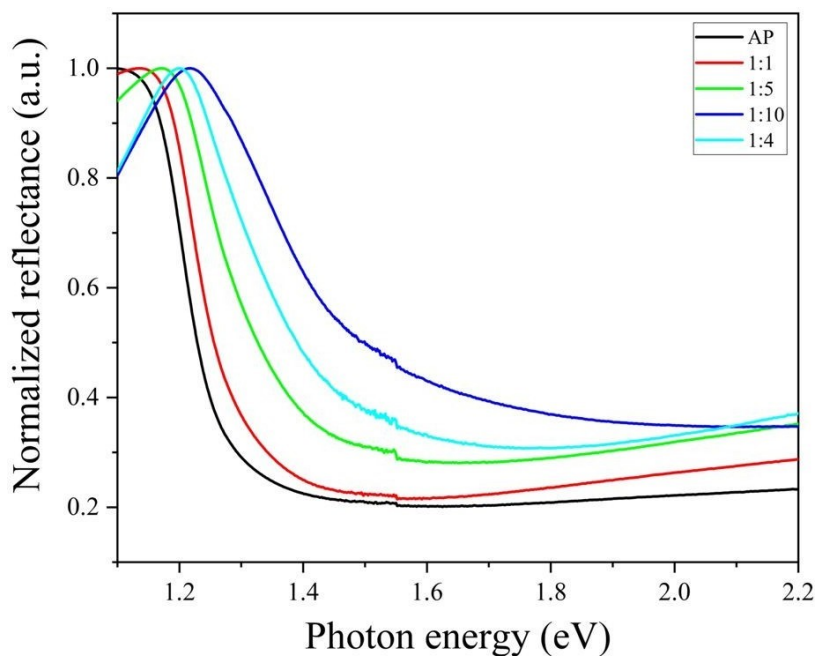

Figure S2. Diffuse reflectance spectra of antimony selenide NWs deposited from solutions having same en: EDT ratios, but different metal organic complex concentrations (*Sb-Se post-dissolution en:EDT dilution series*)

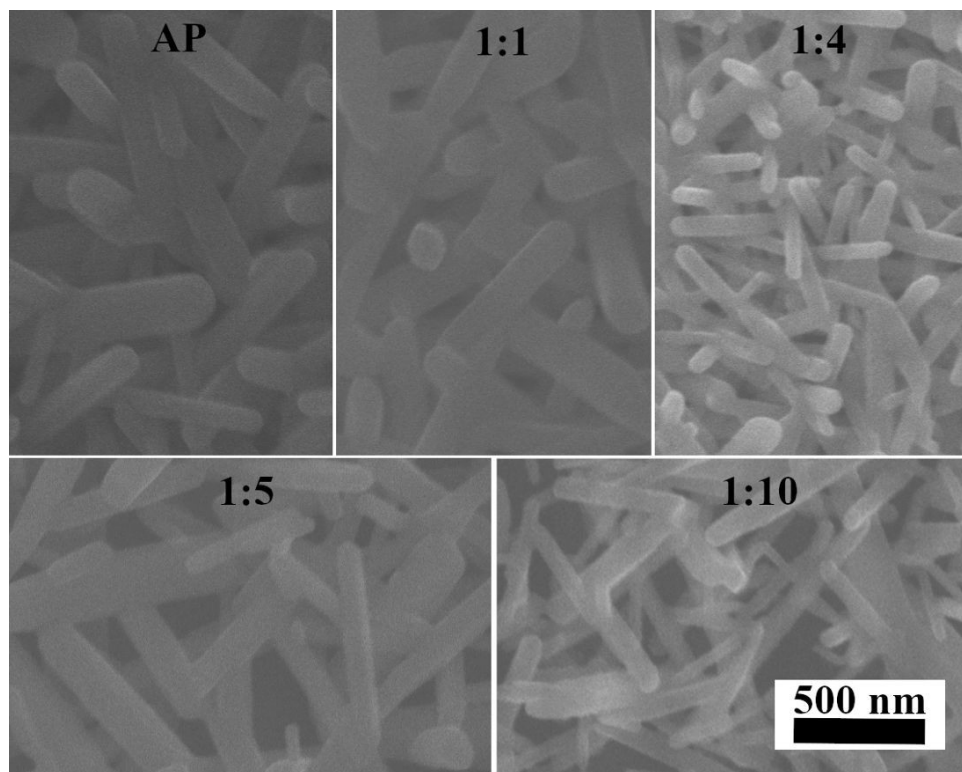

Figure S3. SEM images of antimony selenide NWs deposited from ‘*post-dissolution en:EDT dilution series*’.

Table S1. Post-dissolution en:EDT dilution series: Se/Sb elemental ratio and NWs’ diameter.

| <i>Sample</i> | <i>Se/ Sb atomic ratio</i> | <i>Diameter (nm)</i> |
|---------------|----------------------------|----------------------|
| <i>AP</i>     | $1.41 \pm 0.02$            | $100 \pm 30$         |
| <i>1:1</i>    | $1.45 \pm 0.04$            | $108 \pm 29$         |
| <i>1:5</i>    | $1.29 \pm 0.04$            | $81 \pm 21$          |
| <i>1:10</i>   | $1.22 \pm 0.05$            | $57 \pm 16$          |
| <i>1:4*</i>   | $1.35 \pm 0.07$            | $55 \pm 17$          |

\*This solution got solidified after dilution with en-EDT solvent mixture.

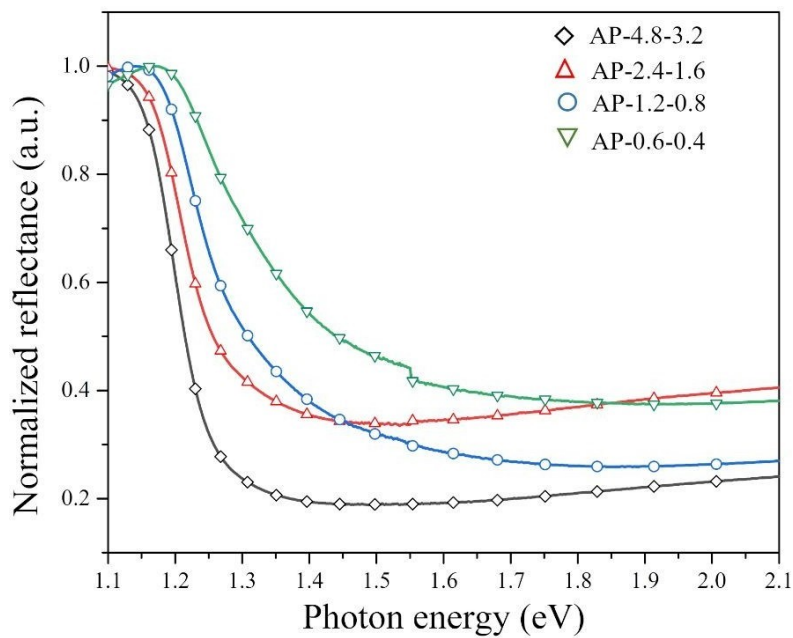

Figure S4. Diffuse reflectance spectra of antimony selenide NWs deposited from solutions having same en: EDT molar ratios (*pre-dissolution en:EDT dilution series*; en: EDT ratio was 4:1 (v/v) in all samples; numbers designate Se-Sb at%).

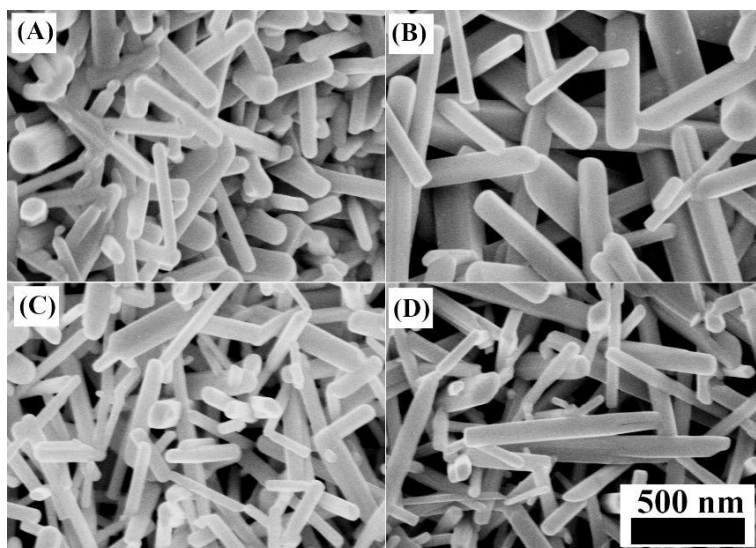

Figure S5. SEM images of antimony selenide NWs deposited from ‘*pre-dissolution en:EDT dilution series*’ (A) AP-4.8-3.2 (B) AP-2.4-1.6 (C) AP-1.2-0.8 and (D) AP-0.6-0.4.

Table S2. Pre-dissolution en:EDT dilution series: Experimental details, band gap, NWs diameter and Se/Sb elemental ratio.

| <i>Sample</i>     | <i>Se</i><br>(mmol) | <i>Sb</i><br>(mmol) | <i>en</i><br>(mL) | <i>EDT</i><br>(mL) | <i>Band gap</i><br>(eV) | <i>Average diameter</i><br>(nm) | <i>Se/Sb ratio</i><br>(atomic) by<br><i>SEM-EDS</i> |
|-------------------|---------------------|---------------------|-------------------|--------------------|-------------------------|---------------------------------|-----------------------------------------------------|
| <i>AP-4.8-3.2</i> | 4.8                 | 3.2                 | 1.6               | 0.4                | 1.16                    | 115 ± 41                        | 1.42 ± 0.03                                         |
| <i>AP-2.4-1.6</i> | 2.4                 | 1.6                 | 1.6               | 0.4                | 1.17                    | 136 ± 53                        | 1.30 ± 0.02                                         |
| <i>AP-1.2-0.8</i> | 1.2                 | 0.8                 | 1.6               | 0.4                | 1.19                    | 100 ± 41                        | 1.29 ± 0.02                                         |
| <i>AP-0.6-0.4</i> | 0.6                 | 0.4                 | 1.6               | 0.4                | 1.22                    | 89 ± 40                         | 1.35 ± 0.01                                         |

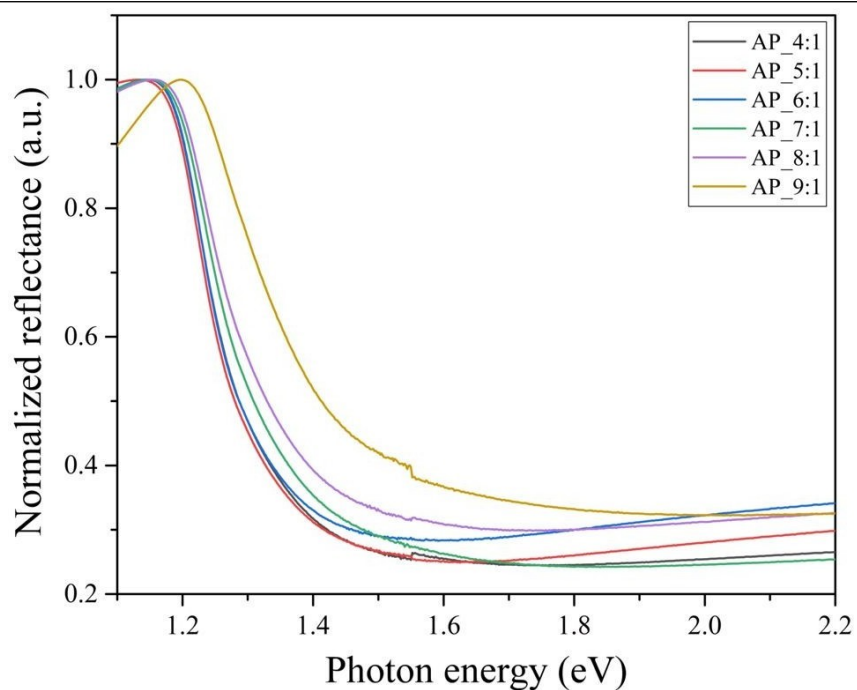

Figure S6. Diffuse reflectance spectra of antimony selenide NWs deposited from ‘pre-dissolution en dilution series’. 4:1, 5:1, 6:1, 7:1, 8:1 and 9:1 are the en: EDT volume ratios that have been used.

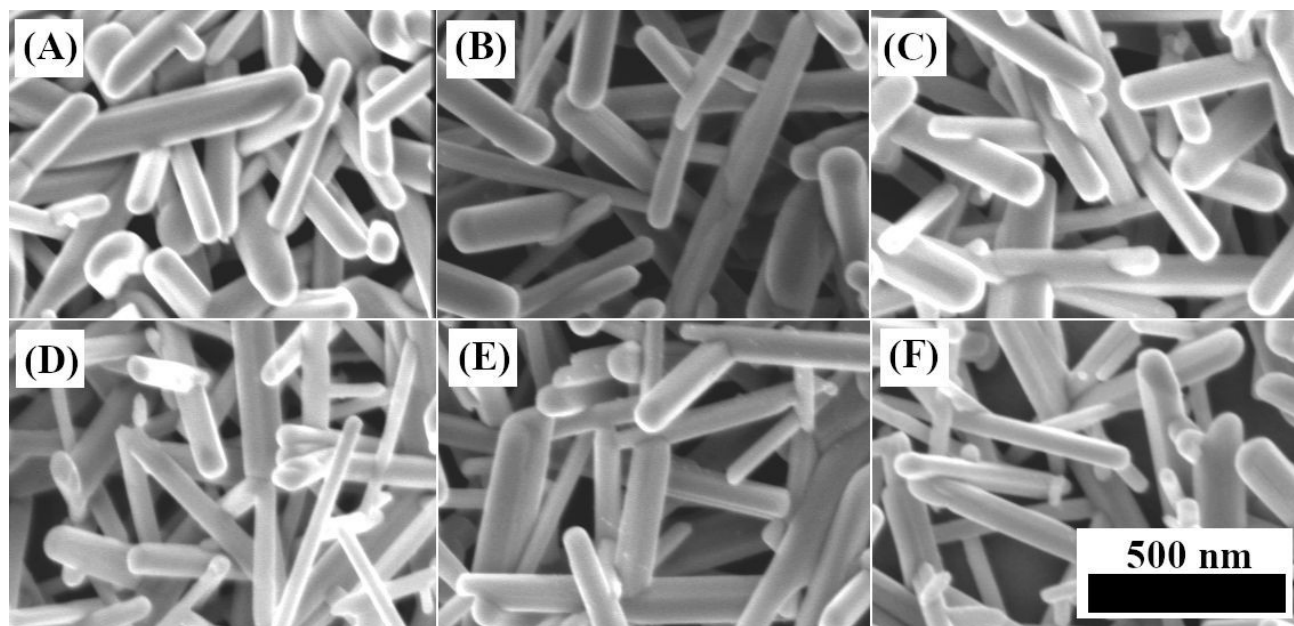

Figure S7. SEM images of antimony selenide NWs deposited from ‘*pre-dissolution en dilution series* (A) AP-4:1 (B) AP-5:1 (C) AP-6:1 (D) AP-7:1 (E) AP-8:1 and (F) AP-9:1.

Table S3. Pre-dissolution en dilution series: Experimental details, NWs diameter and Se/Sb elemental ratio.

| <i>Sample</i> | <i>Se</i><br>( <i>mmol</i> ) | <i>Sb</i><br>( <i>mmol</i> ) | <i>en</i><br>( <i>mL</i> ) | <i>EDT</i><br>( <i>mL</i> ) | <i>Average</i><br><i>diameter</i><br>( <i>nm</i> ) | <i>Se/Sb atomic</i><br><i>ratio by SEM-</i><br><i>EDS</i> |
|---------------|------------------------------|------------------------------|----------------------------|-----------------------------|----------------------------------------------------|-----------------------------------------------------------|
| <i>AP-4:1</i> | 4.8                          | 3.2                          | 1.6                        | 0.4                         | 125 ± 40                                           | 1.40 ± 0.05                                               |
| <i>AP-5:1</i> | 4.8                          | 3.2                          | 2.0                        | 0.4                         | 128 ± 35                                           | 1.44 ± 0.09                                               |
| <i>AP-6:1</i> | 4.8                          | 3.2                          | 2.4                        | 0.4                         | 96 ± 34                                            | 1.45 ± 0.08                                               |
| <i>AP-7:1</i> | 4.8                          | 3.2                          | 2.8                        | 0.4                         | 76 ± 27                                            | 1.30 ± 0.07                                               |
| <i>AP-8:1</i> | 4.8                          | 3.2                          | 3.2                        | 0.4                         | 108 ± 38                                           | 1.36 ± 0.13                                               |
| <i>AP-9:1</i> | 4.8                          | 3.2                          | 3.6                        | 0.4                         | 70 ± 32                                            | 1.26 ± 0.08                                               |

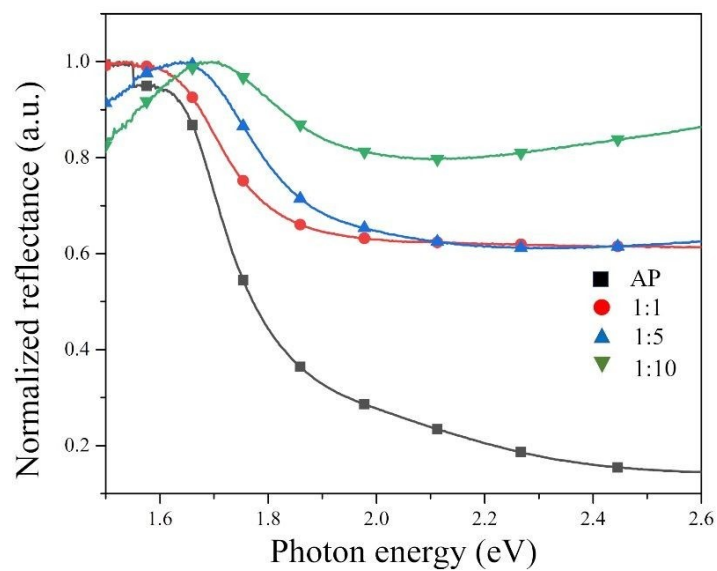

Figure S8. Diffused reflectance spectroscopy of  $\text{Sb}_2\text{S}_3$  nanowires deposited from en: EDT solvent mixture.

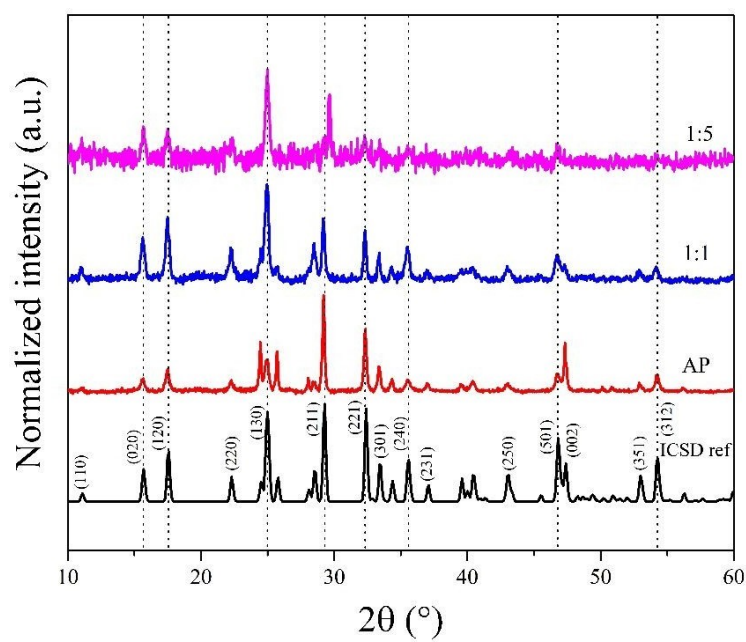

Figure S9. X-Ray Diffraction pattern of  $\text{Sb}_2\text{S}_3$  nanowires deposited from different en: EDT solvent mixture.

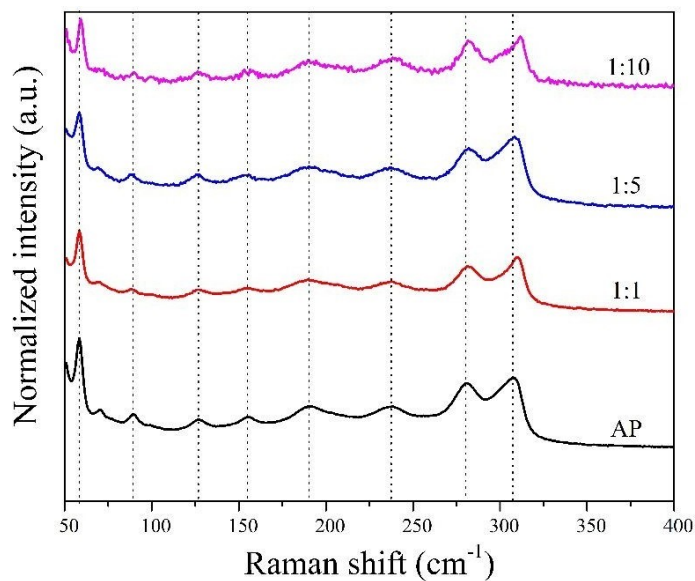

Figure S10. Raman spectra of  $\text{Sb}_2\text{S}_3$  nanowires deposited from different en: EDT solvent mixture.

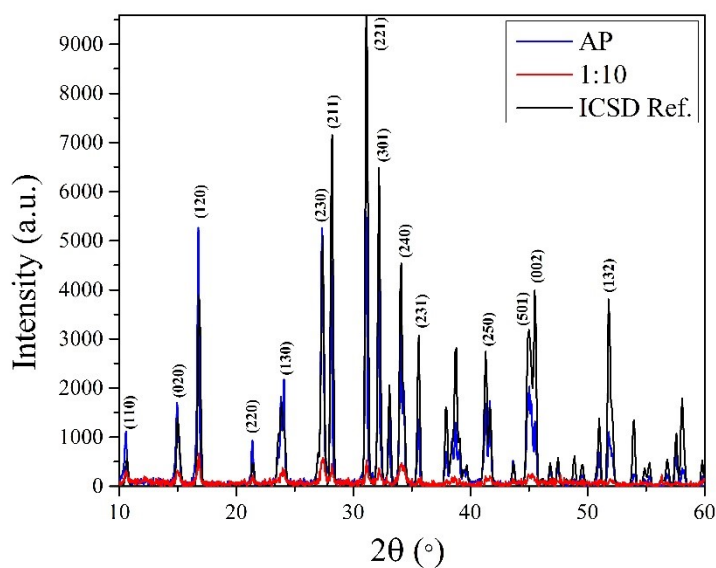

Figure S11. X-Ray Diffraction pattern of  $\text{Sb}_2\text{Se}_3$  nanowires (post-dissolution en-dilution series) deposited from AP and 1:10 solutions.

Table S4. Se: Sb elemental ratio of antimony selenide NWs calculated from TEM-EDS.

| Sample | EDT: en molar ratio | Se to Sb ratio by TEM-EDS (NWs body) | Se to Sb ratio by TEM-EDS (NWs tips) |
|--------|---------------------|--------------------------------------|--------------------------------------|
| AP     | 1: 4.97             | $1.54 \pm 0.04$                      | $1.33 \pm 0.01$                      |
| 1:1    | 1: 5.13             | $1.48 \pm 0.03$                      | $1.43 \pm 0.02$                      |
| 1:5    | 1: 5.76             | $1.36 \pm 0.07$                      | $1.24 \pm 0.01$                      |
| 1:10   | 1: 6.54             | $1.27 \pm 0.04$                      | $1.23 \pm 0.01$                      |



Table S5. Se: Sb elemental ratio and % atomic O in antimony selenide NWs (deposited on Au-coated Si substrate) calculated from SEM-EDS

| <i>Sample</i> | <i>Se/Sb atomic ratio</i> | <i>O (atomic)</i> |
|---------------|---------------------------|-------------------|
| <i>1:1</i>    | $1.26 \pm 0.10$           | $3.80 \pm 0.14$   |
| <i>1:4</i>    | $1.14 \pm 0.03$           | $3.17 \pm 0.71$   |
| <i>1:5</i>    | $0.93 \pm 0.08$           | $2.73 \pm 2.33$   |
| <i>1:10</i>   | $0.71 \pm 0.01$           | $4.27 \pm 0.22$   |
